# Supplementary material for: DDX49 is an RNA helicase that affects translation by regulating mRNA export and the levels of pre-ribosomal RNA
Source: PubMed Central journal article supplement (PMC6158705; doi:10.1093/nar/gky231), 2018-03-30
Supplement: gky231_supplemental_files.pdf [file gky231_supplemental_files.pdf]

## **Supplementary information for**

### **DDX49 is an RNA helicase that affects translation by regulating mRNA export and the levels of pre-ribosomal RNA**

Sharad Awasthi<sup>1</sup>, Mamta Verma<sup>1</sup>, Arun Mahesh<sup>1</sup>, Mohd. Imran K. Khan<sup>1</sup>, Gayathri Govindaraju<sup>2</sup>, Arumugam Rajavelu<sup>2</sup>, Pavithra L. Chavali<sup>3</sup>, Sreenivas Chavali<sup>3\*</sup> & Arunkumar Dhayalan<sup>1\*</sup>

<sup>1</sup>Department of Biotechnology, Pondicherry University, Puducherry - 605 014, India

<sup>2</sup>Bacterial and Parasite Disease Biology, Rajiv Gandhi Center for Biotechnology, Trivandrum - 695 014, India

<sup>3</sup>MRC Laboratory of Molecular Biology, Francis Crick Avenue, Cambridge Biomedical Campus, Cambridge CB2 0QH, UK



|              |     | 130R  | 140T  | 150V  | 160Q  | 170E |       |      |       |      |       |       |       |       |      |       |     |     |      |      |       |      |     |      |      |       |      |       |       |       |       |       |      |     |     |     |     |     |     |     |   |   |   |     |   |   |     |   |     |     |     |     |     |     |     |   |   |     |
|--------------|-----|-------|-------|-------|-------|------|-------|------|-------|------|-------|-------|-------|-------|------|-------|-----|-----|------|------|-------|------|-----|------|------|-------|------|-------|-------|-------|-------|-------|------|-----|-----|-----|-----|-----|-----|-----|---|---|---|-----|---|---|-----|---|-----|-----|-----|-----|-----|-----|-----|---|---|-----|
| DDX49/1-483  | 121 | PHVVI | ATPGR | LADHL | RSSNT | FFS  | IKKIR | FLV  | MEADR | LLE  | EQG   | TD    | FTVD  | LEA   | L    | AAV   | PAR | 180 |      |      |       |      |     |      |      |       |      |       |       |       |       |       |      |     |     |     |     |     |     |     |   |   |   |     |   |   |     |   |     |     |     |     |     |     |     |   |   |     |
| DDX47/1-455  | 143 | PH    | II    | ATPGR | LIDHL | ENTK | GFN   | LRAL | KYL   | VM   | DEADR | ILN   | ---   | MD    | FETE | VDK   | L   | KV  | IPDR | 199  |       |      |     |      |      |       |      |       |       |       |       |       |      |     |     |     |     |     |     |     |   |   |   |     |   |   |     |   |     |     |     |     |     |     |     |   |   |     |
| DDX23/1-820  | 519 | CE    | VI    | ATPGR | LIDVL | ENRY | -     | LVL  | SRTC  | YV   | VL    | DEADR | MID   | ---   | MG   | FEPD  | VQK | L   | EHMP | VSR  | 600   |      |     |      |      |       |      |       |       |       |       |       |      |     |     |     |     |     |     |     |   |   |   |     |   |   |     |   |     |     |     |     |     |     |     |   |   |     |
| DDX27/1-796  | 340 | PD    | LI    | ATPGR | LIDHL | HNC  | PS    | FH   | LSSI  | EVL  | IL    | DEADR | MLD   | ---   | EY   | FEEQ  | MKE | L   | IRMC | SHHR | 396   |      |     |      |      |       |      |       |       |       |       |       |      |     |     |     |     |     |     |     |   |   |   |     |   |   |     |   |     |     |     |     |     |     |     |   |   |     |
| DD19A/1-478  | 212 | --    | VI    | IGT   | PGTV  | LWC  | SKL   | KF   | ID    | PKKI | KV    | FV    | DEADR | VM    | IAT  | ---   | QG  | HQD | QSI  | R    | QRL   | PRNC | 267 |      |      |       |      |       |       |       |       |       |      |     |     |     |     |     |     |     |   |   |   |     |   |   |     |   |     |     |     |     |     |     |     |   |   |     |
| DD19B/1-479  | 213 | --    | VI    | IGT   | PGTV  | LWC  | SKL   | KF   | ID    | PKKI | KV    | FV    | DEADR | VM    | IAT  | ---   | QG  | HQD | QSI  | R    | QRL   | PRNC | 268 |      |      |       |      |       |       |       |       |       |      |     |     |     |     |     |     |     |   |   |   |     |   |   |     |   |     |     |     |     |     |     |     |   |   |     |
| DDX25/1-483  | 218 | --    | II    | IGT   | PGTV  | LWC  | FKL   | KL   | ID    | LTK  | IR    | V     | FV    | DEADR | VM   | IDT   | --- | QG  | FSD  | H    | SIR   | Q    | RAL | PSEC | 273  |       |      |       |       |       |       |       |      |     |     |     |     |     |     |     |   |   |   |     |   |   |     |   |     |     |     |     |     |     |     |   |   |     |
| DDX6/1-483   | 216 | VH    | VVI   | ATPGR | LIDL  | L    | IKK   | GV   | -     | AKV  | DH    | VQM   | VL    | DEADR | KLL  | S     | --- | QD  | FVQ  | I    | MED   | I    | L   | TL   | PKNR | 271   |      |       |       |       |       |       |      |     |     |     |     |     |     |     |   |   |   |     |   |   |     |   |     |     |     |     |     |     |     |   |   |     |
| DDX48/1-411  | 157 | QH    | VV    | AGT   | PGR   | V    | FDM   | IRRR | S     | -    | LR    | TR    | A     | KML   | VL   | DEADR | EML | N   | ---  | KG   | FKE   | Q    | YD  | V    | YR   | YL    | PPAT | 212   |       |       |       |       |      |     |     |     |     |     |     |     |   |   |   |     |   |   |     |   |     |     |     |     |     |     |     |   |   |     |
| DDX28/1-407  | 153 | PH    | II    | VGT   | PGR   | V    | FDM   | LNR  | RY    | -    | L     | SP    | KWI   | KMF   | VL   | DEADR | EML | S   | ---  | RG   | F     | KDQ  | I   | Y    | F    | Q     | KL   | N     | TSI   | 208   |       |       |      |     |     |     |     |     |     |     |   |   |   |     |   |   |     |   |     |     |     |     |     |     |     |   |   |     |
| DDX2A/1-406  | 152 | PH    | II    | VGT   | PGR   | V    | FDM   | LNR  | RY    | -    | L     | SP    | KYI   | KMF   | VL   | DEADR | EML | S   | ---  | RG   | F     | KDQ  | I   | Y    | F    | Q     | KL   | N     | SNT   | 207   |       |       |      |     |     |     |     |     |     |     |   |   |   |     |   |   |     |   |     |     |     |     |     |     |     |   |   |     |
| DX39B/1-428  | 166 | PH    | II    | VGT   | PGR   | I    | L     | A    | L     | ARN  | K     | S     | -     | LN    | L    | KH    | I   | KH  | F    | L    | DEADR | EML  | S   | ---  | LD   | M     | R    | R     | D     | VQE   | 222   |       |      |     |     |     |     |     |     |     |   |   |   |     |   |   |     |   |     |     |     |     |     |     |     |   |   |     |
| DX39A/1-427  | 165 | PH    | V     | V     | G     | T    | P     | G    | R     | I    | L     | A     | L     | V     | R    | N     | R   | S   | -    | F    | S     | L    | K   | N    | V    | K     | H    | F     | L     | DEADR | EML   | S     | ---  | LD  | M   | R   | R   | D   | VQE | 221 |   |   |   |     |   |   |     |   |     |     |     |     |     |     |     |   |   |     |
| DDX20/1-824  | 181 | CH    | II    | AVG   | SPGR  | I    | K     | Q    | L     | I    | E     | L     | D     | Y     | -    | LN    | P   | G   | S    | I    | R     | L    | F   | I    | L    | DEADR | KLL  | E     | E     | -     | GS    | F     | Q    | E   | Q   | I   | N   | W   | Y   | S   | S | L | P | A   | S | K | 378 |   |     |     |     |     |     |     |     |   |   |     |
| DDX59/1-619  | 323 | VK    | VI    | ATPGR | L     | L    | D     | I    | I     | K    | Q     | S     | S     | -     | VE   | L     | C   | G   | V    | K    | I     | V    | V   | D    | EADR | TML   | K    | ---   | MG    | F     | E     | Q     | Q    | V   | L   | D   | E   | N   | I   | P   | N | D | C | 378 |   |   |     |   |     |     |     |     |     |     |     |   |   |     |
| DDX3V/1-660  | 315 | CH    | L     | L     | V     | A    | T     | P    | G     | R    | L     | V     | D     | M     | M    | E     | R   | G   | K    | -    | I     | G    | L   | D    | F    | C     | K    | Y     | L     | V     | L     | DEADR | M    | L   | D   | --- | MG  | F   | E   | P   | Q | I | R | R   | L | E | N   | I | P   | N   | D   | C   | 378 |     |     |   |   |     |
| DDX3X/1-662  | 317 | CH    | L     | L     | V     | A    | T     | P    | G     | R    | L     | V     | D     | M     | M    | E     | R   | G   | K    | -    | I     | G    | L   | D    | F    | C     | K    | Y     | L     | V     | L     | DEADR | M    | L   | D   | --- | MG  | F   | E   | P   | Q | I | R | R   | L | E | N   | I | P   | N   | D   | C   | 378 |     |     |   |   |     |
| DDX4/1-724   | 416 | CN    | I     | L     | C     | A    | T     | P    | G     | R    | L     | M     | D     | I     | G    | K     | E   | K   | -    | I    | G     | L    | K   | Q    | I    | K     | Y    | L     | V     | L     | DEADR | M     | L    | D   | --- | MG  | F   | G   | P   | E   | M | K | L | I   | S | C | M   | P | S   | K   | 475 |     |     |     |     |   |   |     |
| DDX46/1-1031 | 496 | AE    | I     | V     | C     | T    | P     | G    | R     | M    | D     | L     | A     | A     | N    | S     | V   | T   | N    | L    | R     | R    | V   | T    | Y    | V     | L    | DEADR | M     | F     | D     | ---   | MG   | F   | E   | P   | Q   | V   | M   | R   | I | V | D | N   | V | R | P   | D | R   | 554 |     |     |     |     |     |   |   |     |
| DDX42/1-938  | 377 | AE    | I     | V     | C     | T    | P     | G    | R     | L    | I     | D     | H     | V     | K    | K     | A   | -   | T    | N    | L     | R    | S   | V    | L    | V     | D    | EADR  | M     | F     | D     | ---   | MG   | F   | E   | P   | Q   | V   | M   | R   | I | V | D | N   | V | R | P   | D | R   | 432 |     |     |     |     |     |   |   |     |
| DDX17/1-729  | 295 | VE    | I     | C     | I     | A    | T     | P    | G     | R    | L     | I     | D     | F     | L    | E     | S   | G   | K    | -    | T     | N    | L   | R    | R    | C     | T    | Y     | L     | V     | L     | DEADR | M    | L   | D   | --- | MG  | F   | E   | P   | Q | I | R | R   | L | E | N   | I | P   | N   | D   | C   | 350 |     |     |   |   |     |
| DDX5/1-614   | 218 | VE    | I     | C     | I     | A    | T     | P    | G     | R    | L     | I     | D     | F     | L    | E     | S   | G   | K    | -    | T     | N    | L   | R    | R    | T     | Y    | L     | V     | L     | DEADR | M     | L    | D   | --- | MG  | F   | E   | P   | Q   | I | R | R | L   | E | N | I   | P | N   | D   | C   | 350 |     |     |     |   |   |     |
| DDX43/1-648  | 366 | VD    | II    | I     | A     | T    | P     | G    | R     | L    | N     | D     | L     | Q     | M    | N     | F   | -   | V    | N    | L     | K    | I   | T    | Y    | L     | V    | L     | DEADR | M     | L     | D     | ---  | MG  | F   | E   | P   | Q   | I   | R   | R | L | E | N   | I | P | N   | D | C   | 350 |     |     |     |     |     |   |   |     |
| DDX53/1-631  | 346 | VD    | II    | I     | A     | T    | P     | G    | R     | L    | N     | D     | L     | Q     | M    | N     | S   | -   | V    | N    | L     | R    | S   | I    | T    | Y     | L    | V     | L     | DEADR | M     | L     | D    | --- | MG  | F   | E   | P   | Q   | I   | R | R | L | E   | N | I | P   | N | D   | C   | 350 |     |     |     |     |   |   |     |
| DDX41/1-622  | 314 | VH    | M     | V     | A     | T    | P     | G    | R     | L    | M     | D     | L     | L     | Q    | K     | K   | M   | -    | V    | S     | L    | D   | I    | C    | R     | Y    | L     | A     | L     | DEADR | M     | L    | D   | --- | MG  | F   | E   | G   | D   | I | R | T | I   | F | S | Y   | F | K   | G   | Q   | R   | 369 |     |     |   |   |     |
| DDX54/1-881  | 217 | PD    | II    | I     | A     | T    | P     | G    | R     | L    | V     | H     | V     | A     | E    | M     | S   | -   | L    | K    | L     | Q    | S   | V    | E    | Y     | V    | V     | D     | EADR  | L     | F     | E    | --- | MG  | F   | A   | E   | Q   | L   | E | I | A | R   | L | P | G   | H | 272 |     |     |     |     |     |     |   |   |     |
| DDX56/1-547  | 135 | PD    | V     | V     | V     | G    | T     | P    | S     | R    | I     | L     | S     | H     | L    | Q     | O   | D   | S    | -    | L     | K    | L   | R    | S    | L     | L    | V     | D     | EADR  | L     | L     | F    | S   | --- | FG  | F   | E   | E   | E   | L | K | S | L   | L | C | H   | L | P   | R   | I   | Y   | 191 |     |     |   |   |     |
| DDX52/1-599  | 286 | FD    | L     | V     | T     | T    | P     | N    | R     | L    | I     | Y     | L     | L     | K    | O     | D   | P   | G    | I    | D     | L    | A   | S    | V    | E     | W    | L     | V     | D     | E     | S     | D    | K   | L   | F   | E   | D   | G   | T   | G | F | R | D   | Q | L | A   | S | I   | F   | L   | A   | T   | S   | H   | K | V | 347 |
| DDX21/1-783  | 309 | ID    | L     | V     | G     | T    | P     | G    | R     | I    | K     | D     | H     | I     | Q    | N     | G   | K   | -    | L    | D     | L    | T   | K    | H    | V     | L    | D     | E     | V     | D     | Q     | M    | L   | D   | --- | MG  | F   | A   | D   | Q | V | E | I   | L | S | V   | Y | K   | K   | D   | P   | 369 |     |     |   |   |     |
| DDX50/1-737  | 260 | PE    | I     | V     | G     | T    | P     | G    | R     | I    | K     | D     | H     | L     | Q    | S     | G   | R   | -    | L    | D     | L    | S   | K    | L    | R     | H    | V     | L     | D     | E     | V     | D    | Q   | M   | L   | D   | --- | LG  | F   | A | E | Q | V   | E | D | I   | H | E   | Y   | K   | T   | D   | P   | 320 |   |   |     |
| DDX24/1-859  | 438 | PE    | I     | V     | A     | T    | P     | G    | R     | L    | W     | E     | L     | I     | K    | E     | H   | L   | -    | R    | N     | L    | R   | L    | R    | L     | V    | D     | EADR  | M     | V     | E     | ---  | KG  | F   | A   | E   | L   | S   | O   | L | L | E | M   | L | N | D   | S | R   | 501 |     |     |     |     |     |   |   |     |
| DDX28/1-540  | 256 | AD    | V     | L     | V     | A    | T     | P    | G     | A    | L     | W     | K     | A     | L    | S     | R   | L   | -    | I    | S     | L    | E   | Q    | L    | S     | L    | V     | D     | EADR  | T     | L     | D    | --- | ES  | F   | L   | E   | L   | V   | D | Y | I | L   | E | K | G   | P | A   | D   | A   | 324 |     |     |     |   |   |     |
| DDX31/1-851  | 357 | I     | N     | I     | L     | I    | S     | T    | P     | G    | R     | L     | V     | D     | H    | I     | K   | S   | T    | K    | N     | I    | H   | F    | S    | R     | L    | R     | W     | L     | V     | D     | EADR | I   | L   | D   | --- | LG  | F   | E   | K | D | I | T   | V | I | L   | N | A   | V   | N   | A   | E   | R   | 416 |   |   |     |
| DDX51/1-666  | 340 | AD    | I     | V     | V     | A    | T     | P    | G     | R    | L     | V     | D     | H     | I    | D     | O   | T   | P    | G    | F     | S    | L   | Q    | L    | R     | F    | L     | I     | D     | EADR  | M     | I    | D   | --- | SM  | H   | Q   | S   | W   | L | P | R | V   | V | A | A   | D | P   | A   | D   | L   | 425 |     |     |   |   |     |
| DDX10/1-875  | 191 | I     | N     | I     | L     | V    | C     | T    | P     | G    | R     | L     | L     | Q     | M    | N     | F   | -   | V    | N    | L     | K    | I   | T    | Y    | L     | V    | L     | DEADR | I     | L     | D     | ---  | MG  | F   | A   | D   | T   | M   | N   | A | V | I | E   | N | L | P   | K | K   | R   | 247 |     |     |     |     |   |   |     |
| DDX55/1-600  | 135 | GN    | II    | I     | V     | A    | T     | P    | G     | R    | L     | E     | D     | M     | F    | R     | R   | K   | A    | G    | L     | D    | L   | A    | S    | L     | D    | V     | L     | DEADR | L     | L     | D    | --- | MG  | F   | E   | A   | S   | I   | N | T | I | L   | E | F | L   | P | K   | Q   | R   | 196 |     |     |     |   |   |     |
| DDX18/1-670  | 302 | I     | N     | I     | V     | A    | T     | P    | G     | R    | L     | L     | D     | H     | M    | Q     | N   | T   | P    | G    | F     | M    | Y   | K    | N    | L     | Q    | L     | V     | D     | EADR  | I     | L    | D   | --- | V   | G   | F   | E   | E   | L | K | Q | I   | K | L | P   | T | R   | 358 |     |     |     |     |     |   |   |     |
| DDX1/1-740   | 340 | VD    | II    | V     | G     | T    | P     | G    | R     | L    | D     | L     | V     | S     | T    | G     | K   | -   | L    | N    | L     | S    | Q   | V    | R    | F     | L    | V     | L     | DEADR | G     | L     | L    | S   | --- | Q   | G   | Y   | S   | D   | F | I | N | R   | M | H | N   | Q | V   | T   | S   | D   | L   | 401 |     |   |   |     |

TPGR

VxDExD

|             |     | 190T | 200A | 210Q | 220D | 230V |   |   |   |   |   |   |   |   |   |   |   |   |   |   |   |   |   |   |   |   |   |   |   |     |   |   |   |   |   |   |   |   |   |   |   |   |   |   |   |   |   |   |   |   |   |   |   |   |   |   |     |   |   |     |     |     |
|-------------|-----|------|------|------|------|------|---|---|---|---|---|---|---|---|---|---|---|---|---|---|---|---|---|---|---|---|---|---|---|-----|---|---|---|---|---|---|---|---|---|---|---|---|---|---|---|---|---|---|---|---|---|---|---|---|---|---|-----|---|---|-----|-----|-----|
| DDX49/1-483 | 181 | Q    | T    | L    | L    | F    | S | A | T | L | T | D | T | L | R | E | L | Q | G | L | A | T | N | Q | P | F | F | W | E | A   | Q | A | F | V | S | T | V | E | Q | L | D | Q | R | Y | L | L | V | P | E | K | V | K | D | A | Y | L | V   | H | L | I   | Q   | 240 |
| DDX47/1-455 | 200 | K    | T    | F    | L    | F    | S | A | T | M | T | K | K | V | Q | K | L | Q | R | A | A | L | K | N | P | V | K | C | A | V   | S | S | K | Y | Q | T | V | E | K | L | Q | Q | Y | I | F | I | P | S | K | F | K | D | T | Y | L | V | Y   | I | L | N   | 259 |     |
| DDX23/1-820 | 601 | Q    | T    | M    | F    | T    | A | T | M | P | P | A | V | E | R | L | A | R | S | Y | L | R | R | P | A | V | V | I | G | S   | A | G | K | P | H | E | R | V | E | Q | K | V | F | L | M | S | E | K | R | K | L | L | A | I | L | E | 660 |   |   |     |     |     |
| DDX27/1-796 | 397 | Q    | T    | M    | L    | F    | S | A | T | M | T | D | E | V | K | L | A | S | V | L | - | K | N | P | V | R | I | F | V | N   | S | N | - | T | D | V | A | P | L | R | O | E | F | I | R | I | R | E | G | D | R | E | A | I | V | A | A   | L | T | 459 |     |     |
| DD19A/1-478 | 268 | Q    | M    | L    | L    | F    | S | A | T | F | E | D | S | V | W | K | F | A | Q | V | V | P | D | P | N | V | I | K | L | K   | R | E | E | E | T | L | D | T | I | K | Q | Y | V | V | L | C | S | R | D | E | K | F | A | I | C | N | L   | Y | G | 328 |     |     |
| DD19B/1-479 | 269 | Q    | M    | L    | L    | F    | S | A | T | F | E | D | S | V | W | K | F | A | Q | V | V | P | D | P | N | V | I | K | L | K   | R | E | E | E | T | L | D | T | I | K | Q | Y | V | V | L | C | S | R | D | E | K | F | A | I | C | N | L   | Y | G | 329 |     |     |
| DDX25/1-483 | 274 | Q    | M    | L    | L    | F    | S | A | T | F | E | D | S | V | W | H | F | A | E | R | I | I | P | D | P | N | V | I | K | L   | R | E | E | L | T | L | N | I | R | Q | Y | V | V | L | C | R | D | K | Y | Q | A | L | C | N | Y | G | 334 |   |   |     |     |     |
| DDX6/1-483  | 272 | Q    | I    | L    | L    | S    | A | T | F | P | L | S | V | Q | K | F | M | N | S | H | L | Q | K | P | Y | E | I | N | L | M</ |   |   |   |   |   |   |   |   |   |   |   |   |   |   |   |   |   |   |   |   |   |   |   |   |   |   |     |   |   |     |     |     |

|              |     | 250S | 260T      | 270K | 280S | 290A |   |   |   |   |   |   |   |   |   |   |   |   |   |   |   |   |   |   |   |   |   |   |   |   |   |   |   |   |   |   |   |   |   |   |   |   |   |   |   |   |   |   |   |   |   |   |     |   |   |   |     |     |     |     |     |     |
|--------------|-----|------|-----------|------|------|------|---|---|---|---|---|---|---|---|---|---|---|---|---|---|---|---|---|---|---|---|---|---|---|---|---|---|---|---|---|---|---|---|---|---|---|---|---|---|---|---|---|---|---|---|---|---|-----|---|---|---|-----|-----|-----|-----|-----|-----|
| DDX49/1-483  | 241 | R    | FQDEHEDWS | I    | I    | F    | T | N | T | C | K | T | C | Q | I | L | C | M | M | L | R | K | F | S | F | P | T | V | A | L | H | S | M | M | K | Q | K | E | R | F | A | A | L | A | K | F | K | S | S | I | Y | R | 300 |   |   |   |     |     |     |     |     |     |
| DDX47/1-455  | 260 | E    | L         | A    | G    | N    | - | - | - | - | S | F | M | I | F | C | S | T | C | N | N | T | Q | R | T | A | L | L | R | N | L | G | F | T | A | I | P | L | H | G | Q | M | S | Q | S | K | R | L | G | S | L | N | K   | F | K | A | K   | A   | R   | S   | 315 |     |
| DDX23/1-820  | 661 | Q    | G         | F    | -    | -    | - | - | - | - | P | I | I | F | V | N | Q | K | K | G | C | D | V | L | A | K | S | L | E | K | M | G | Y | N | A | C | T | L | H | G | G | K | G | Q | E | Q | R | F | E | F | A | L | S   | N | L | K | A   | G   | A   | K   | D   | 716 |
| DDX27/1-796  | 460 | R    | T         | F    | T    | D    | - | - | - | H | V | M | L | F | T | Q | T | K | K | Q | A | H | R | M | H | I | L | G | L | M | G | L | Q | V | G | E | L | H | G | N | L | S | Q | T | R | L | E | A | L | R | R | F | K   | D | E | Q | I   | D   | 515 |     |     |     |
| DD19A/1-478  | 329 | A    | I         | T    | I    | A    | - | - | - | Q | A | M | I | F | C | H | T | R | K | T | A | S | W | L | A | E | L | S | K | E | G | H | Q | V | A | L | S | G | E | M | M | V | E | Q | R | A | A | V | I | E | R | F | R   | E | G | K | E   | K   | 384 |     |     |     |
| DD19B/1-479  | 330 | A    | I         | T    | I    | A    | - | - | - | Q | A | M | I | F | C | H | T | R | K | T | A | S | W | L | A | E | L | S | K | E | G | H | Q | V | A | L | S | G | E | M | M | V | E | Q | R | A | A | V | I | E | R | F | R   | E | G | K | E   | K   | 385 |     |     |     |
| DDX25/1-483  | 335 | S    | I         | T    | I    | G    | - | - | - | Q | A | I | F | C | Q | T | R | R | N | A | K | W | L | T | V | E | M | I | Q | D | G | H | Q | V | S | L | S | G | E | L | T | V | E | Q | R | A | S | I | I | Q | R | F | R   | D | G | K | E   | K   | 386 |     |     |     |
| DDX6/1-483   | 331 | R    | L         | Q    | I    | N    | - | - | - | Q | S | I | F | C | N | S | S | Q | R | V | E | L | L | A | K | I | S | Q | L | G | Y | S | C | F | Y | I | H | A | K | M | R | Q | E | H | R | N | R | V | F | H | D | F | R   | N | G | L | C   | R   | 386 |     |     |     |
| DDX48/1-411  | 274 | T    | L         | T    | I    | T    | - | - | - | Q | A | V | I | F | C | N | T | K | R | K | V | D | W | L | T | E | K | M | R | E | A | N | F | T | V | S | S | M | H | G | D | M | P | Q | K | E | R | E | S | I | M | K | E   | F | R | S | G   | A   | S   | R   | 329 |     |
| DDX2B/1-407  | 270 | T    | L         | T    | I    | T    | - | - | - | Q | A | V | I | F | L | N | T | R | R | K | V | D | W | L | T | E | K | M | H | A | R | D | F | T | V | S | A | L | H | G | D | M | D | Q | K | E | R | D | V | I | M | R | E   | F | R | S | G   | S   | S   | R   | 325 |     |
| DDX2A/1-406  | 269 | T    | L         | T    | I    | T    | - | - | - | Q | A | V | I | F | I | N | T | R | R | K | V | D | W | L | T | E | K | M | H | A | R | D | F | T | V | S | A | M | H | G | D | M | D | Q | K | E | R | D | V | I | M | R | E   | F | R | S | G   | S   | S   | R   | 324 |     |
| DX39B/1-428  | 284 | V    | L         | E    | F    | N    | - | - | - | Q | V | V | I | F | V | K | S | V | Q | R | C | I | A | L | A | Q | L | L | V | E | Q | N | F | P | A | I | A | I | H | R | G | M | P | Q | E | E | R | L | S | R | Y | Q | Q   | F | K | D | F   | Q   | R   | R   | 339 |     |
| DX39A/1-427  | 283 | V    | L         | E    | F    | N    | - | - | - | Q | V | I | F | V | K | S | V | Q | R | C | M | A | L | A | Q | L | L | V | E | Q | N | F | P | A | I | A | I | H | R | G | M | A | Q | E | E | R | L | S | R | Y | Q | Q | F   | K | D | F | Q   | R   | R   | 338 |     |     |
| DDX20/1-824  | 306 | R    | I         | P    | F    | N    | - | - | - | Q | A | L | I | F | V | S | N | L | H | S | R | A | Q | M | L | A | D | L | S | S | K | G | F | P | A | E | C | I | S | G | N | M | N | Q | N | O | R | L | D | A | M | A | K   | L | K | H | F   | H   | C   | R   | 361 |     |
| DDX59/1-619  | 439 | D    | K         | K    | F    | K    | P | - | - | P | V | L | V | F | V | D | C | K | L | G | A | D | L | L | S | E | A | V | Q | K | T | G | L | K | S | I | S | I | H | S | E | K | S | I | E | R | K | N | I | L | K | G | L   | E | G | D | Y   | E   | 487 |     |     |     |
| DDX3Y/1-660  | 435 | A    | T         | G    | S    | D    | - | - | - | L | T | L | V | F | V | E | T | K | K | G | A | D | S | L | E | D | F | L | Y | H | E | G | Y | A | C | T | S | I | H | G | D | R | S | Q | R | D | E | E | A | L | H | Q | F   | R | S | G | K   | S   | P   | 491 |     |     |
| DDX3X/1-662  | 437 | A    | T         | G    | K    | S    | - | - | - | L | T | L | V | F | V | E | T | K | K | G | A | D | S | L | E | D | F | L | Y | H | E | G | Y | A | C | T | S | I | H | G | D | R | S | Q | R | D | E | E | A | L | H | Q | F   | R | S | G | K   | S   | P   | 493 |     |     |
| DDX4/1-724   | 537 | N    | I         | G    | D    | E    | - | - | - | R | T | M | V | F | V | E | T | K | K | A | D | F | I | A | T | L | C | Q | E | K | I | S | T | S | I | H | G | D | R | E | Q | R | E | E | Q | A | L | G | D | F | R | F | G   | K | C | P | 592 |     |     |     |     |     |
| DDX46/1-1031 | 615 | H    | Y         | Q    | E    | S    | G | - | - | S | V | I | F | V | D | K | E | H | A | D | G | L | L | K | D | L | M | R | A | S | Y | P | C | M | S | L | H | G | I | D | Q | Y | D | R | S | I | I | N | D | F | K | N | G   | T | K | P | 671 |     |     |     |     |     |
| DDX42/1-938  | 494 | E    | F         | T    | S    | S    | G | - | - | S | V | L | F | V | T | K | K | A | N | A | E | E | L | A | N | N | L | K | Q | E | G | H | N | L | G | L | H | G | D | M | D | Q | S | E | R | N | K | V | I | S | D | F | K   | K | D | I | P   | 550 |     |     |     |     |
| DDX17/1-729  | 412 | E    | I         | M    | K    | N    | - | - | - | K | T | I | F | V | E | T | K | R | C | D | L | T | R | R | M | R | R | D | G | W | P | A | M | C | I | H | G | D | K | S | Q | P | E | R | D | W | V | L | N | E | F | R | S   | G | K | A | P   | 470 |     |     |     |     |
| DDX5/1-614   | 335 | E    | I         | M    | K    | N    | - | - | - | K | T | I | F | V | E | T | K | R | C | D | L | T | R | R | M | R | R | D | G | W | P | A | M | C | I | H | G | D | K | S | Q | P | E | R | D | W | V | L | N | E | F | R | S   | G | K | A | P   | 393 |     |     |     |     |
| DDX43/1-648  | 483 | S    | M         | S    | T    | D    | - | - | - | K | V | I | F | V | S | R | K | A | V | A | D | H | L | S | S | D | L | I | L | G | N | I | S | V | E | S | L | H | G | D | R | E | Q | R | D | E | K | A | L | E | N | F | K   | T | G | K | V   | R   | 519 |     |     |     |
| DDX53/1-631  | 463 | N    | M         | S    | P    | D    | - | - | - | K | V | I | F | V | S | Q | K | H | I | A | D | D | L | S | S | D | F | I | Q | G | I | S | A | E | S | L | H | G | N | S | E | Q | S | D | E | R | A | V | E | N | F | K | S   | G | N | I | K   | 539 |     |     |     |     |
| DDX41/1-622  | 430 | K    | T         | P    | -    | -    | - | - | - | P | V | L | I | F | A | E | K | K | A | D | V | A | I | H | E | Y | L | L | K | G | V | E | A | V | A | I | H | G | K | D | Q | E | E | R | T | K | A | I | E | A | F | R | E   | G | K | D | 484 |     |     |     |     |     |
| DDX54/1-881  | 333 | N    | V         | V    | P    | Q    | D | - | - | Q | T | V | V | F | V | A | T | K | H | H | A | E | Y | L | T | E | L | L | T | T | O | R | V | S | C | A | H | I | Y | S | A | L | D | P | T | A | R | K | I | N | L | A | K   | F | T | L | G   | K   | C   | S   | 390 |     |
| DDX56/1-547  | 254 | L    | S         | L    | I    | R    | G | - | - | K | S | L | L | F | V | N | T | L | E | R | S | Y | R | L | R | L | F | L | E | Q | F | S | I | P | T | C | V | L | N | G | E | L | P | L | R | S | C | H | I | I | S | Q | F   | N | Q | F | Y   | D   | 310 |     |     |     |
| DDX52/1-599  | 409 | K    | G         | F    | -    | -    | - | - | - | N | P | P | V | L | V | F | V | Q | S | I | E | R | A | K | E | L | F | H | E | L | I | Y | E | G | I | N | V | D | V | I | H | A | E | R | T | Q | Q | R | D | N | T | V | H   | S | F | R | A   | G   | K   | I   | W   | 464 |
| DDX21/1-783  | 433 | V    | Y         | S    | H    | Q    | G | - | - | R | T | I | F | C | E | T | K | K | E | A | Q | E | L | S | N | S | A | I | - | K | Q | D | A | Q | S | L | H | G | D | I | P | Q | K | R | E | I | T | L | G | F | R | N | G   | S | F | G | 489 |     |     |     |     |     |
| DDX50/1-737  | 384 | V    | Y         | S    | S    | E    | G | - | - | R | A | I | F | C | E | T | K | K | N | V | T | E | M | A | M | N | P | H | I | - | K | Q | N | A | Q | C | L | H | G | D | I | A | Q | S | Q | R | E | I | T | L | G | F | R   | E | G | S | F   | G   | 440 |     |     |     |
| DDX24/1-859  | 585 | Q    | Y         | P    | -    | -    | - | - | - | R | S | L | V | F | A | N | S | I | S | C | I | K | R | L | S | G | L | L | K | V | L | D | I | M | P | L | T | H | A | C | M | H | Q | K | Q | R | L | R | N | L | E | Q | F   | A | R | L | E   | D   | C   | 639 |     |     |
| DDX28/1-540  | 387 | H    | R         | D    | T    | G    | P | S | G | T | V | L | V | F | C | N | S | S | T | V | N | W | L | G | L | L | D | D | H | K | I | Q | H | L | R | L | Q | G | O | M | P | A | L | M | R | V | G | I | F | Q | S | F | Q   | K | S | R | D   | 449 |     |     |     |     |
| DDX31/1-851  | 503 | K    | Q         | E    | D    | Q    | - | - | - | K | M | V | F | F | S | C | E | L | V | E | F | H | Y | S | L | F | L | Q | M | R | L | K | F | L | R | L | H | G | G | M | E | Q | E | E | R | T | A | V | F | E | F | S | H   | S | R | R | G   | 580 |     |     |     |     |
| DDX51/1-666  | 501 | E    | M         | G    | F    | S    | - | - | - | R | V | L | C | F | T | N | S | R | E | N | S | H | R | L | F | L | L | V | Q | A | G | G | V | D | V | A | E | F | S | S | R | Y | G | P | Q | R | M | I | L | K | Q | F | E   | Q | K | I | Q   | 557 |     |     |     |     |
| DDX10/1-875  | 310 | S    | H         | L    | K    | K    | - | - | - | K | S | I | V | F | F | S | C | K | E | V | Q | Y | L | Y | R | V | F | C | R | P | G | V | S | I | L | A | L | H | G | R | Q | Q | M | R | E | M | E | V | N | E | F | V | R   | K | R | A | A   | 367 |     |     |     |     |
| DDX55/1-600  | 264 | N    | H         | L    | K    | E    | - | - | - | K | H | L | V | F | F | S | T | A | C | E | V | E | Y | G | K | L | E | V | K | G | V | K | I | M | C | I | H | G | K | M | - | K | Y | K | R | N | K | I | F | M | E | F | R   | K | L | G | S   | 320 |     |     |     |     |
| DDX18/1-670  | 422 | K    | N         | R    | K    | K    | - | - | - | K | L | M | V | F | F | S | C | M | S | V | K | Y | H | E | L | N | Y | I | D | L | P | V | L | A | I | H | G | K | Q | K | Q | N | K | R | T | T | T | F | F | Q | F | C | N   | A | D | S | G   | 477 |     |     |     |     |
| DDX1/1-740   | 494 | G    | E         | Y    | K    | E    | H | K | M | D | Q | A | I | I | F | C | R | T | K | I | D | C | D | N | L | E | Q | Y | F | I | Q | H | F | S | C | V | C | L | H | G | D |   |   |   |   |   |   |   |   |   |   |   |     |   |   |   |     |     |     |     |     |     |



was set as the reference sequence and all insertions are masked. The positions of insertions are shown by vertical dotted red lines. Conserved residue columns with sequence identity > 40% are highlighted in blue color, with darker color indicating higher conservation. The grey numbers indicate the start and end of the specific DExD box helicase for a given section of MSA. The number followed by amino acid at the top of the alignment corresponds to the residue position in the reference, DDX49. Sequence motifs, predicted based on conservation profiles, are provided at the bottom of the MSA with a brown line.

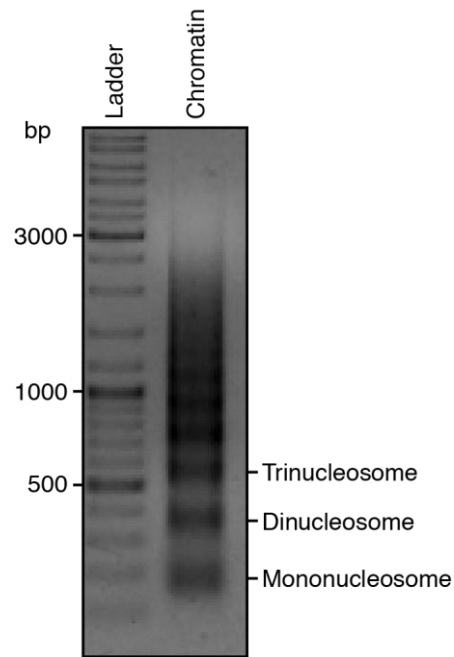

**Supplementary Figure S2. Chromatin preparation from HEK293 cells**

The sheared chromatin was run on 1% agarose gel and stained with ethidium bromide. The gel shows the presence of mononucleosomes, dinucleosomes, trinucleosomes and higher molecular weight chromatin.

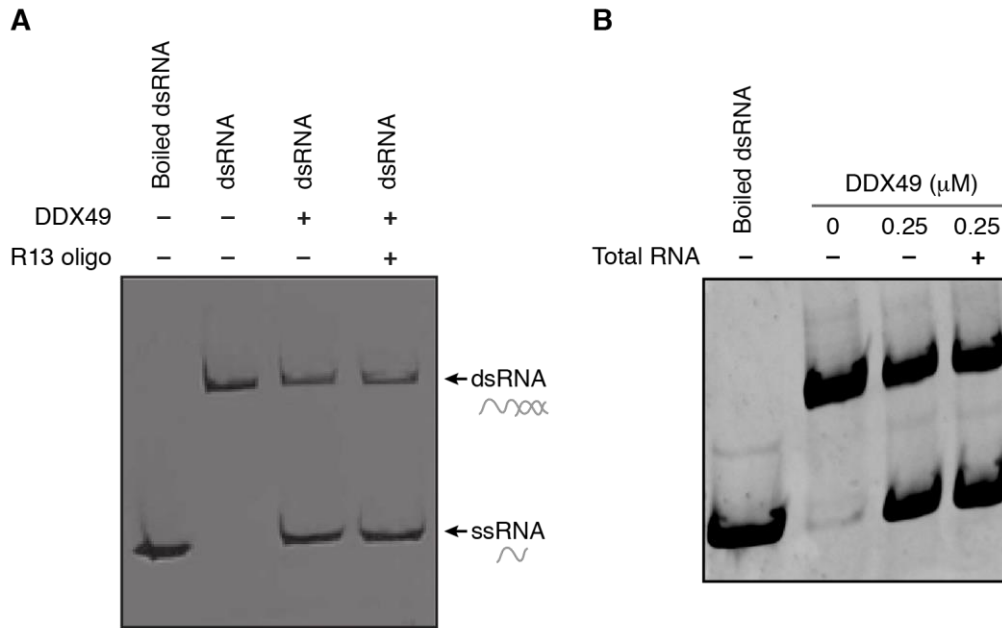

**Supplementary Figure S3. The helicase activity of DDX49 is RNA independent**

RNA helicase activity of DDX49 was determined in the presence and absence of R13 RNA oligo (**A**) or Total RNA (**B**).



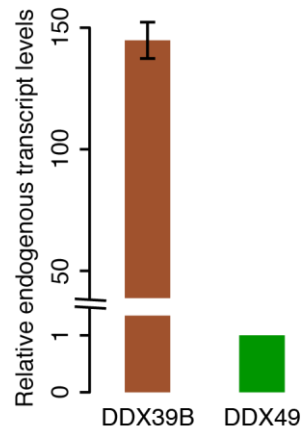

**Supplementary Figure S4. Relative quantification of endogenous DDX39B and DDX49 transcript levels**

Quantitative RT-PCR analysis of DDX39B and DDX49 levels in HEK293 cells. The levels of DDX39B and DDX49 were normalized to GAPDH expression and are presented relative to the DDX49 expression. Data are represented as mean of three independent experiments, with error bars representing standard deviation.

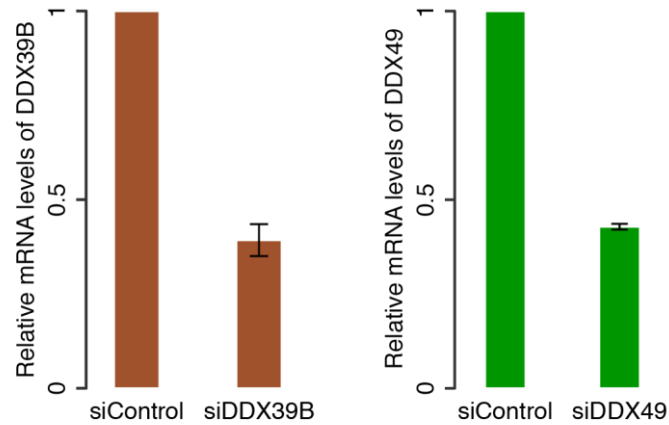

**Supplementary Figure S5. Efficiency of siRNA mediated knockdown of DDX39B and DDX49**

Efficiency of siRNA mediated knockdown of DDX39B or DDX49 transcripts was tested using quantitative RT-PCR analysis in HeLa cells. Cells were transfected with control siRNA, DDX39B siRNA (left panel) or DDX49 siRNA (right panel). The transcript levels of DDX39B and DDX49 were normalized to GAPDH expression and are presented relative to the control sample. Data are represented as mean of three independent experiments, with error bars representing standard deviation.

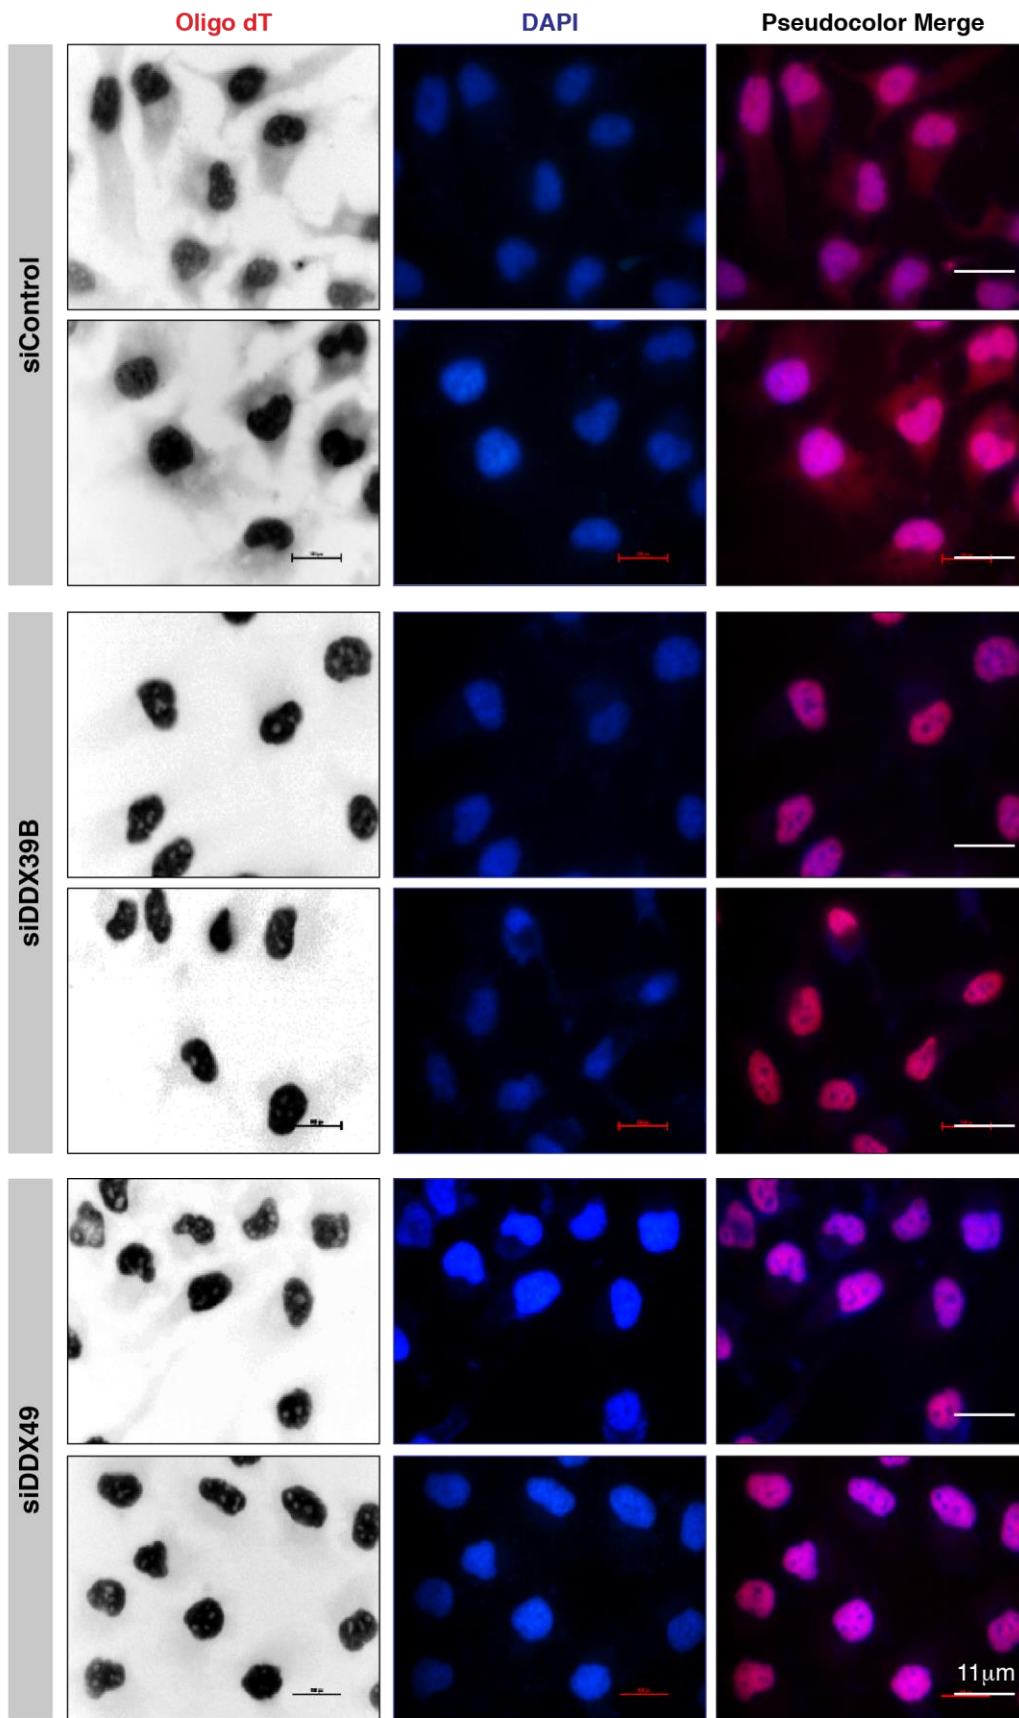

**Supplementary Figure S6. DDX49 is essential for efficient poly (A)<sup>+</sup> RNA export**

HeLa cells treated with control, DDX39B or DDX49 siRNA were fixed and poly (A)<sup>+</sup> RNAs were labelled with ATTO 550 dye (red in merge; inverted grey image in monochrome channel). Subsequently, cells were washed with SSC buffer and DNA stained with DAPI (blue) and embedded in Mowiol. Images were acquired using fluorescence microscope (Nikon-Eclipse 80i) with 100X oil immersion objective. Scale bar is depicted.

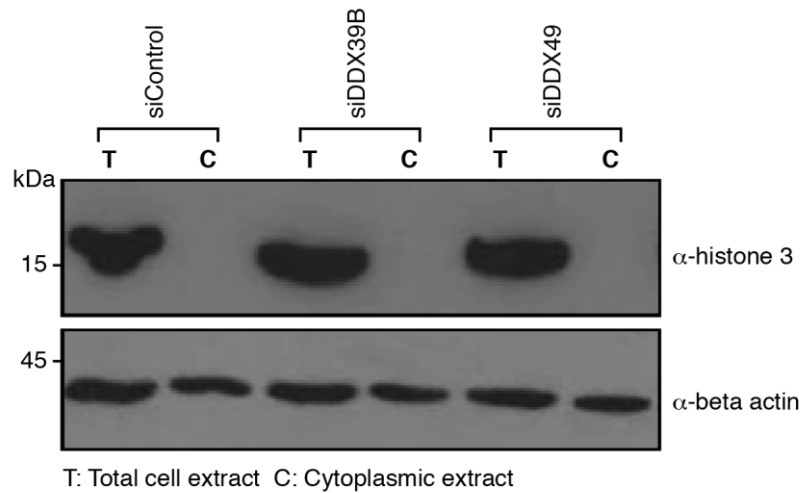

**Supplementary Figure S7. The purity of the cytoplasmic extract used for the quantification of mRNA export (Corresponds to Figure 2C)**

Western blot analysis of total (T) and cytoplasmic (C) extracts prepared from HeLa cells, which were transfected with control siRNA, DDX39B siRNA or DDX49 siRNA. The immunoblotting was performed with histone 3 antibody (nuclear protein) or beta actin antibody. The absence of histone 3 signal in cytoplasmic extracts indicates the absence of nuclear leakage in the cytoplasmic fractions.

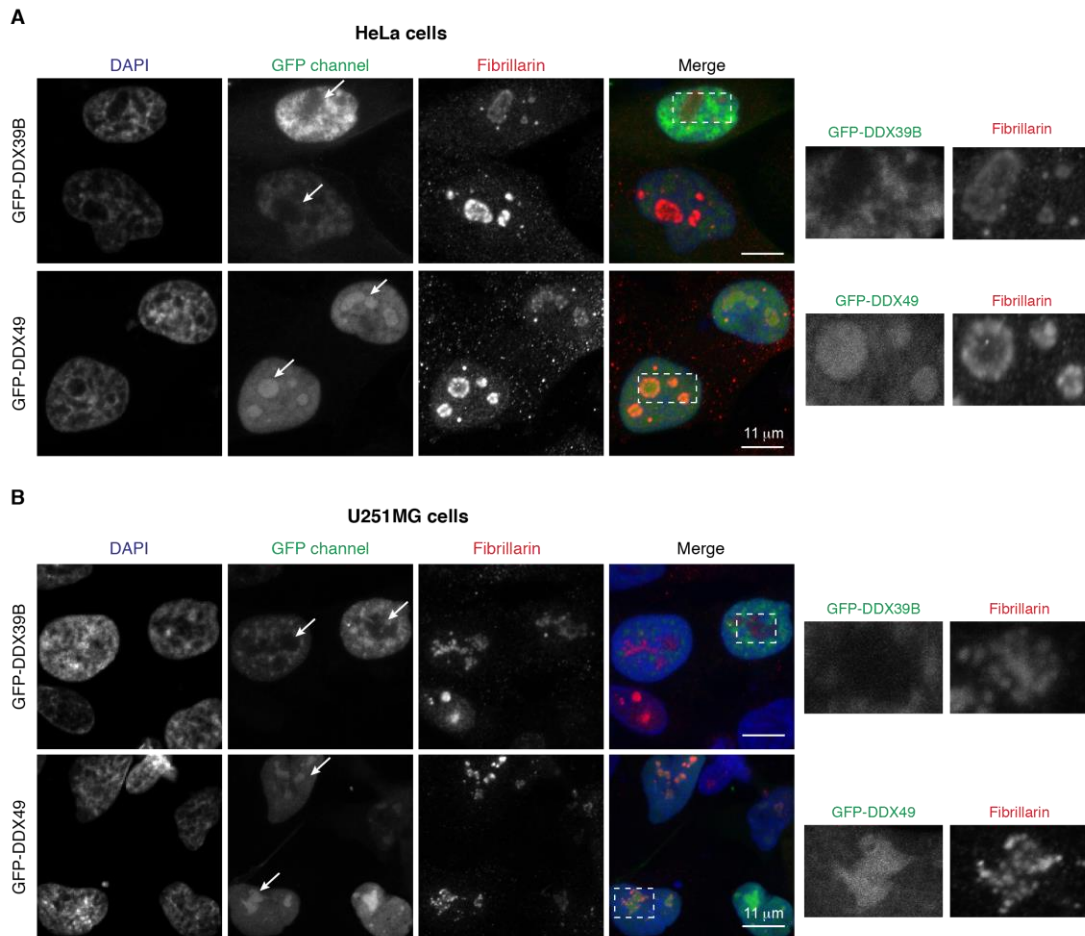

**Supplementary Figure S8. Subcellular localization of DDX49 and DDX39B in different cell types**

DDX49 is localized in the nucleolus. Representative images depicting the colocalization of DDX49 and fibrillarin in (A) HeLa cells and (B) U251MG cells. Cells were transfected with pEGFP-DDX49 or pEGFP-DDX39B (green), immunostained with fibrillarin antibody (red), which stains the nucleolus. DAPI is shown in blue. Representative image depicting the colocalization of DDX49 and fibrillarin and the absence of colocalization of DDX39B with fibrillarin. The white arrows indicate the nucleolus. Insets show the magnified images of the regions outlined by the dotted white squares. Scale bar is depicted.

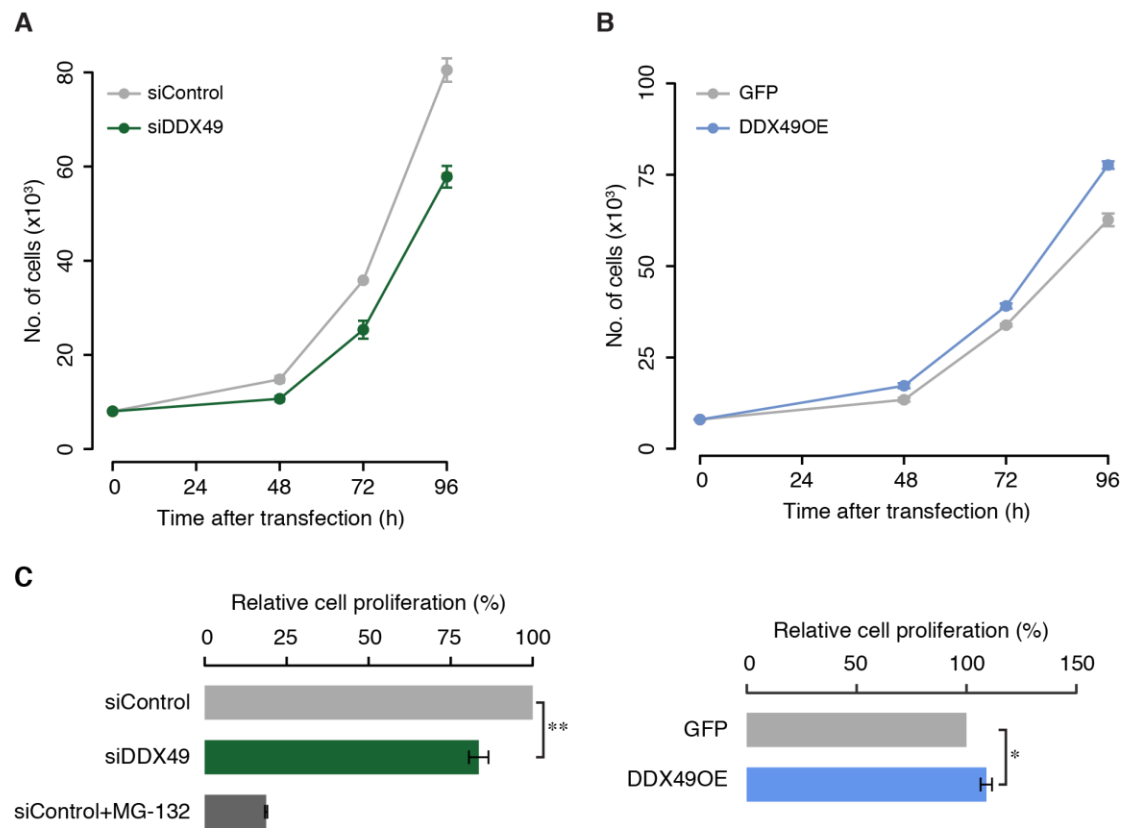

### Supplementary Figure S9. Effect of DDX49 perturbation on cell proliferation

(A) Depletion of DDX49 (siDDX49) inhibits cell proliferation. HeLa cells were transfected with control siRNA or DDX49 siRNA and the cell numbers were counted at 48, 72 and 96 hours post transfection. The dots represent the mean of triplicates, with error bars representing standard deviation. (B) Overexpression of DDX49 (DDX49OE) promotes cell proliferation. HeLa cells were transfected with pEGFP-C1 vector or pEGFP-DDX49 and the cell numbers were counted 48, 72 and 96 hours post transfection. The dots represent the mean of triplicates, with error bars representing standard deviation. (C) HeLa cells were transfected with the control or DDX49 siRNAs or treated with 0.5  $\mu$ g of MG-132 (left panel) or pEGFP-DDX49 (right panel). After 72 hours of transfection or drug treatment, MTT assay was performed. MG-132 is a potent proteosomal inhibitor known to induce apoptosis (2,3) was used as positive control for the assay. Data are represented as mean of three independent experiments, with error bars representing standard deviation. Statistical significance was estimated using two-tailed T-test. \* indicates  $P < 0.05$  and \*\* indicates  $P < 0.01$ .

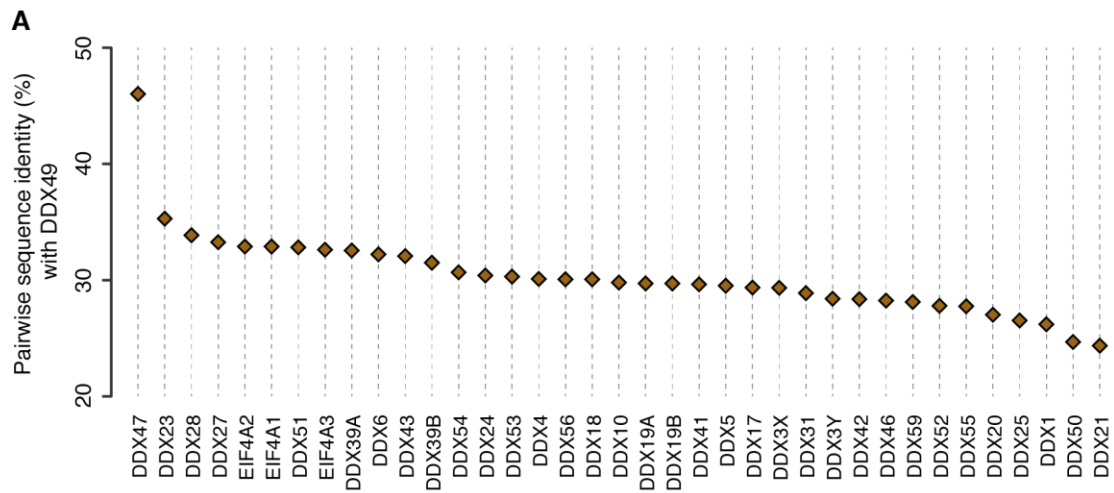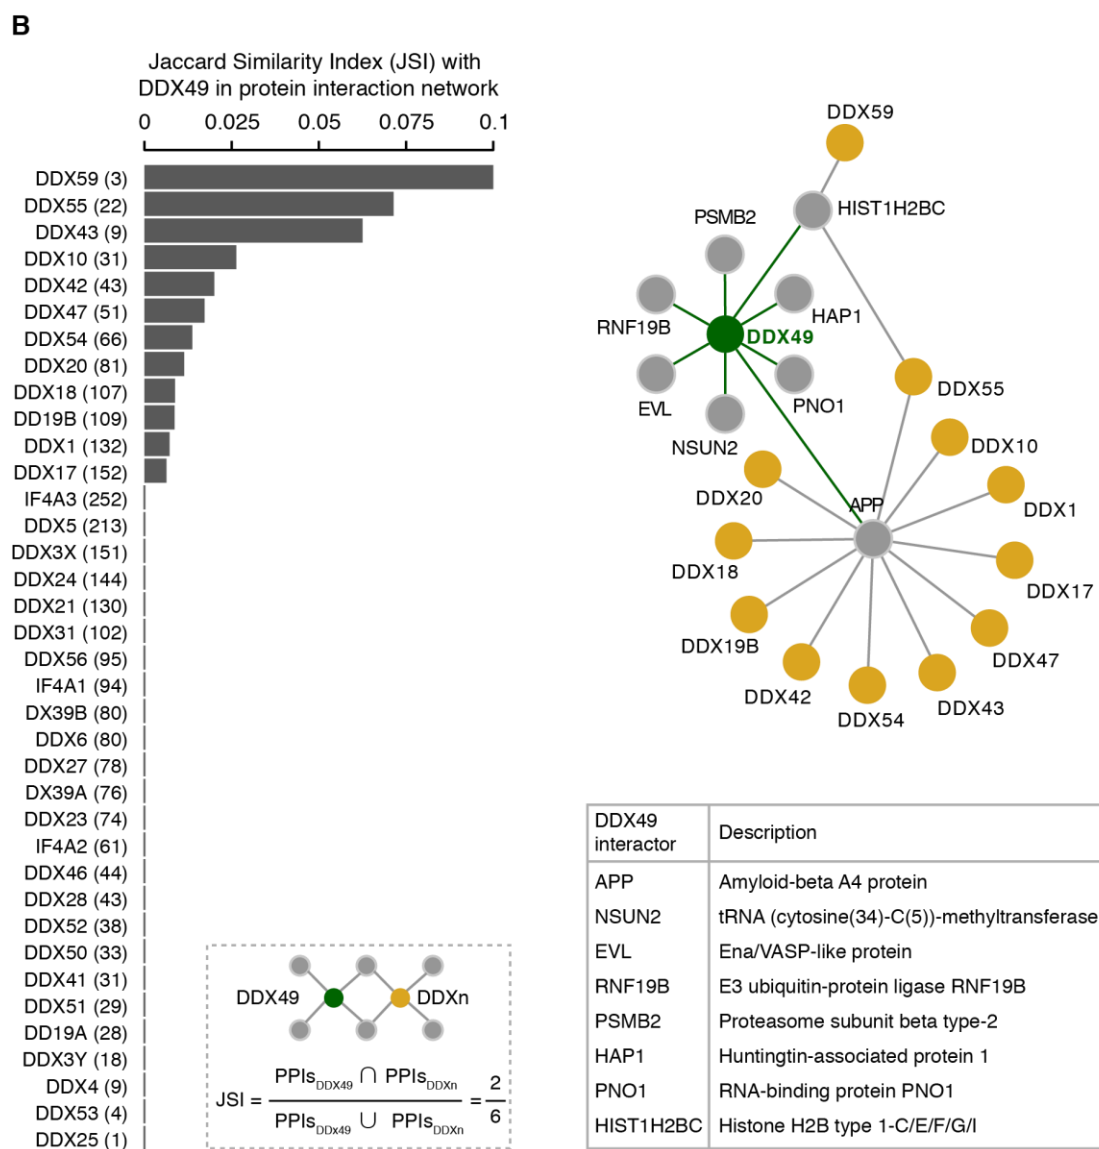

**Supplementary Figure S10. DDX49 is a distinct DExD box RNA helicase**



(A) Pairwise sequence identity of DDX49 with the other DExD box RNA helicases.

(B) Protein-protein interaction landscape of DDX49. The bar plot on the left shows the extent of overlap of interaction partners between DDX49 and other DExD box RNA helicases, quantified using Jaccard Similarity Index (JSI). The legend at the bottom provides a schematic representation of how JSI was calculated. The numbers in the parenthesis represent the number of protein interactors identified so far for the corresponding DExD box helicase. The network on the right, drawn using Cytoscape, shows the interaction of DDX49 interactors with diverse DExD box RNA helicases. DDX49 (green color node) and its interaction partners (grey nodes) are connected by green color links. Golden yellow nodes represent the other DExD box RNA helicases and the grey links show their connections with the interaction partners of DDX49. The table below the network provides a brief description of the proteins interacting with DDX49.

**Supplementary Table S1. Members of human DExD family of RNA helicases**

| <b>Uniprot accession</b> | <b>Ensembl gene</b> | <b>Entrez gene</b> | <b>Gene name(s)</b>                   | <b>Protein length</b> | <b>DExD Motif type</b> | <b>DExD Motif position</b> |
|--------------------------|---------------------|--------------------|---------------------------------------|-----------------------|------------------------|----------------------------|
| Q9H8H2                   | ENSG00000125485     | 64794              | DDX31                                 | 851                   | DEAD                   | 388-391                    |
| O15523                   | ENSG00000067048     | 8653               | DDX3Y, DBY                            | 660                   | DEAD                   | 345-348                    |
| Q9NUU7                   | ENSG00000168872     | 55308              | DDX19A, DDX19L                        | 478                   | DEAD                   | 241-244                    |
| Q9UMR2                   | ENSG00000157349     | 11269              | DDX19B, DBP5, DDX19, TDBP             | 479                   | DEAD                   | 242-245                    |
| Q92499                   | ENSG00000079785     | 1653               | DDX1                                  | 740                   | DEAD                   | 370-373                    |
| Q7L014                   | ENSG00000145833     | 9879               | DDX46, KIAA0801                       | 1031                  | DEAD                   | 529-532                    |
| Q9Y6V7                   | ENSG00000105671     | 54555              | DDX49                                 | 483                   | DEAD                   | 152-155                    |
| Q13838                   | ENSG00000198563     | 7919               | DDX39B, BAT1, UAP56                   | 428                   | DECD                   | 196-199                    |
| Q13206                   | ENSG00000178105     | 1662               | DDX10                                 | 875                   | DEAD                   | 222-225                    |
| Q9NVP1                   | ENSG00000088205     | 8886               | DDX18, cPERP-D                        | 670                   | DEAD                   | 333-336                    |
| Q9GZR7                   | ENSG00000089737     | 57062              | DDX24                                 | 859                   | DEAD                   | 471-474                    |
| Q96GQ7                   | ENSG00000124228     | 55661              | DDX27, cPERP-F, RHLF, HSPC259, PP3241 | 796                   | DEAD                   | 371-374                    |
| O00571                   | ENSG00000215301     | 1654               | DDX3X, DBX, DDX3                      | 662                   | DEAD                   | 347-350                    |
| Q9NXZ2                   | ENSG00000080007     | 55510              | DDX43, HAGE                           | 648                   | DEAD                   | 396-399                    |
| Q86TM3                   | ENSG00000184735     | 168400             | DDX53, CAGE                           | 631                   | DEAD                   | 376-379                    |
| Q8NHQ9                   | ENSG00000111364     | 57696              | DDX55, KIAA1595                       | 600                   | DEAD                   | 171-174                    |
| Q5T1V6                   | ENSG00000118197     | 83479              | DDX59, ZNHIT5                         | 619                   | DEAD                   | 353-356                    |
| Q9NR30                   | ENSG00000165732     | 9188               | DDX21                                 | 783                   | DEV D                  | 339-342                    |
| Q9UHL0                   | ENSG00000109832     | 29118              | DDX25, GRTH                           | 483                   | DEAD                   | 247-250                    |
| Q9UJV9                   | ENSG00000183258     | 51428              | DDX41, ABS                            | 622                   | DEAD                   | 344-347                    |
| Q9Y2R4                   | ENSG00000278053     | 11056              | DDX52, ROK1, HUSSY-19                 | 599                   | DESD                   | 318-321                    |
| Q9UHI6                   | ENSG00000064703     | 11218              | DDX20, DP103, GEMIN3                  | 824                   | DEAD                   | 211-214                    |

| <b>Uniprot accession</b> | <b>Ensembl gene</b> | <b>Entrez gene</b> | <b>Gene name(s)</b>     | <b>Protein length</b> | <b>DExD Motif type</b> | <b>DExD Motif position</b> |
|--------------------------|---------------------|--------------------|-------------------------|-----------------------|------------------------|----------------------------|
| Q9NUL7                   | ENSG00000182810     | 55794              | DDX28, MDDX28           | 540                   | DEAD                   | 286-289                    |
| Q9H0S4                   | ENSG00000213782     | 51202              | DDX47                   | 455                   | DEAD                   | 174-177                    |
| Q9NQI0                   | ENSG00000152670     | 54514              | DDX4, VASA              | 724                   | DEAD                   | 446-449                    |
| Q9BQ39                   | ENSG00000107625     | 79009              | DDX50                   | 737                   | DEV D                  | 290-293                    |
| Q8TDD1                   | ENSG00000123064     | 79039              | DDX54                   | 881                   | DEAD                   | 247-250                    |
| P26196                   | ENSG00000110367     | 1656               | DDX6, HLR2, RCK         | 483                   | DEAD                   | 246-249                    |
| Q86XP3                   | ENSG00000198231     | 11325              | DDX42                   | 938                   | DEAD                   | 407-410                    |
| Q8N8A6                   | ENSG00000185163     | 317781             | DDX51                   | 666                   | DEAD                   | 371-374                    |
| Q92841                   | ENSG00000100201     | 10521              | DDX17                   | 729                   | DEAD                   | 325-328                    |
| Q9BUQ8                   | ENSG00000174243     | 9416               | DDX23                   | 820                   | DEAD                   | 549-552                    |
| Q9NY93                   | ENSG00000136271     | 54606              | DDX56, DDX21, NOH61     | 547                   | DEAD                   | 166-169                    |
| P17844                   | ENSG00000108654     | 1655               | DDX5, G17P1, HELR, HLR1 | 614                   | DEAD                   | 248-251                    |
| O00148                   | ENSG00000123136     | 10212              | DDX39A, DDX39           | 427                   | DECD                   | 195-198                    |
| P38919                   | ENSG00000141543     | 9775               | EIF4A3, DDX48, KIAA0111 | 411                   | DEAD                   | 187-190                    |
| Q14240                   | ENSG00000156976     | 1974               | EIF4A2, DDX2B, EIF4F    | 407                   | DEAD                   | 183-186                    |
| P60842                   | ENSG00000161960     | 1973               | EIF4A1, DDX2A, EIF4A    | 406                   | DEAD                   | 182-185                    |

**Supplementary Table S2. List of the siRNAs used in various experiments**

| siRNA     | Sequence (5' to 3') (Sense strand) |
|-----------|------------------------------------|
| siControl | AUCCGCGCGAUAGUACGUA                |
| siDDX49   | GAGAGUGUGAGAUCAAACU                |
| siDDX39B  | GUGCUACCUUGAGCAAAGA                |

**Supplementary Table S3. List of the primers used in qPCR for various investigations**

| Gene Name   | Sequence (5' to 3')      | Investigation     |
|-------------|--------------------------|-------------------|
| U1 snRNA-FP | ACCTGGCAGGGGAGATACCA     | mRNA Export       |
| U1 snRNA-RP | GGGGAAAGCGCGAACGCAGT     | mRNA Export       |
| Egr1-FP     | GACCCGTTCGGATCCTTTCC     | mRNA Export       |
| Egr1-RP     | GCCACAAGGTGTTGCCACTG     | mRNA Export       |
| GAPDH-FP    | TCACCAGGGCTGCTTTTAAC     | mRNA Export       |
| GAPDH-RP    | TGACGGTGCCATGGAATTTG     | mRNA Export       |
| YY2-FP      | TATAGCGGCTGCGAAAAGAT     | mRNA Export       |
| YY2-RP      | CTTTGCCACATTCTGCACAT     | mRNA Export       |
| 47S rRNA-FP | CTGTCCTCTGGCGACCTG       | 47S rRNA level    |
| 47S rRNA-RP | GAGAGAACAGCAGGCCCG       | 47S rRNA level    |
| DDX39B-FP   | GAGCAAAGAGATCCGTCCAG     | DDX39B Expression |
| DDX39B-RP   | TTCCGGTTCTTCTCGTTGTC     | DDX39B Expression |
| DDX49-FP    | CTTCTTCTGGGAAGCACAGG     | DDX49 Expression  |
| DDX49-RP    | TTCATCATGGAGTGCAGAGC     | DDX49 Expression  |
| H42-FP      | GCACCGTTTGTGTGGGGTTGG    | ChIP              |
| H42-RP      | CGAGACAGATCCGGCTGGCAG    | ChIP              |
| H0-FP       | GGAGGTATATCTTTTCGCTCCGAG | ChIP              |
| H0-RP       | GACGACAGGTCGCCAGAGGA     | ChIP              |
| H13-FP      | ACCTGGCGCTAAACCATTTCGT   | ChIP              |
| H13-RP      | GGACAAACCCTTGTGTCGAGG    | ChIP              |
| H18-FP      | GTTGACGTACAGGGTGGACTG    | ChIP              |
| H18-RP      | GGAAGTTGTCTTCACGCCTGA    | ChIP              |

### Supplementary References

1. Katoh, K. and Standley, D.M. (2013) MAFFT multiple sequence alignment software version 7: improvements in performance and usability. *Molecular biology and evolution*, 30, 772-780.
2. Shinohara, K., Tomioka, M., Nakano, H., Tone, S., Ito, H. and Kawashima, S. (1996) Apoptosis induction resulting from proteasome inhibition. *The Biochemical journal*, 317 ( Pt 2), 385-388.
3. Grimm, L.M., Goldberg, A.L., Poirier, G.G., Schwartz, L.M. and Osborne, B.A. (1996) Proteasomes play an essential role in thymocyte apoptosis. *The EMBO journal*, 15, 3835-3844.
